# Supplementary material
Source: PubMed Central journal article supplement (PMC3628562)
Supplement: mmc1.pdf [file mmc1.pdf]

# Platelet motion near a vessel wall or thrombus surface in 2D whole blood simulations - Supplementary Information

## **Movie1.avi**

Movie1.avi shows a simulation of a platelet past a preformed clot with porosity 0.21. Some platelets were observed spending extended times near the upstream or downstream edges of the clot. In this particular simulation, the platelet can be seen near the downstream edge of the clot for several milliseconds.

## **Movie2.avi**

Movie2.avi shows a simulation of a platelet past a preformed clot with porosity 0.67. Platelets moving past clots with higher porosity tend to spend more time close to the clot.

## **Movie3.avi**

Movie3.avi shows a simulation of a platelet past a preformed clot with porosity 0.82. The platelet in this case does not move past the clot, rather it penetrates the clot and becomes immobilized.
